# Supplementary material
Source: Springer Nature journal article supplement (https://www.springermedizin.de/resource/supplementary/12889_2013_5272_MOESM3_ESM.pdf/9495010)
Supplement: MOESM3 [file 9495010]

Quiénes somos  
Qué te proponemos  
Cómo participar

¡Detente, polizón!  
¡Identifícate! ¡Enfátizate!

# ¡Alerta Brumete!

Forum and  
Chat

Scores

Challenge  
chest

Videos

Diet  
analysis

Games

Library  
and links

¡Alerta  
Brumete!

Quiénes somos | Qué te proponemos | Cómo participar | Contacto  
Aprende a combatir el cáncer | Baúl de los retos | Dinos cómo comes  
Sigue sus consejos | Quién va en cabeza | Comunicaciones | Ocio

Esta página está diseñada para ser vista a una resolución de 1024x768 o superior.

© Prevencanadol. Proyecto financiado por el Fondo de Investigación Sanitaria. Ref: 080544

niños con cáncer  
Federación Española de Padres

edúcastur

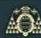

Un  
de Gracia

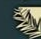

INSTITUTO  
MADRILEÑO DE ESTUDIOS  
AVANZADOS EN NUTRICIÓN

indigo
